# Supplementary material for: Selective CO2 reduction on topological Chern magnet TbMn6Sn6
Source: Royal Society of Chemistry journal article supplement (doi:10.1039/d2cp02754b), 2022-01-01
Supplement: d2cp02754b1.pdf [file d2cp02754b1.pdf]

## Supplementary Information

### Selective CO<sub>2</sub> Reduction on Topological Chern Magnet TbMn<sub>6</sub>Sn<sub>6</sub>

Xi-Mei Li, Zheng-Zhe Lin<sup>\*</sup>, Xin-Wei Chen and Xi Chen<sup>†</sup>

*School of Physics, Xidian University, Xi'an 710071, China*

<sup>\*</sup> Corresponding Author. E-mail address: [zzlin@xidian.edu.cn](mailto:zzlin@xidian.edu.cn)

<sup>†</sup> Corresponding Author. E-mail address: [xichen\\_phys@xidian.edu.cn](mailto:xichen_phys@xidian.edu.cn)

#### 1. Computing Hubbard $U$ from linear response

A linear response approach<sup>1</sup> is employed to calculate the effective Hubbard  $U$ . The basic idea of this approach is the observation that the DFT total energy is a quadratic function of on-site occupations<sup>2</sup>. By the rotationally invariant formulation<sup>3</sup>, the total energy functional of DFT +  $U$  can be written as

$$E_{\text{DFT}+U}[n] = E_{\text{DFT}}[n] + E_U[n_{mm'}^{l\sigma}],$$

where  $E_{\text{DFT}}$  is a standard approximate DFT functional and  $E_U$  is the Hubbard correction, according to the simplified functional given by

$$E_U = \sum_{l\sigma} \frac{U-J}{2} \text{Tr}[n^{l\sigma}(1-n^{l\sigma})] = \sum_{l\sigma} \frac{U_{\text{eff}}}{2} \text{Tr}[n^{l\sigma}(1-n^{l\sigma})].$$

By the linear-response  $U$  approach, the response function can be calculated as  $\chi^{\mathbf{I}} = \partial n^{\mathbf{I}} / \partial \alpha^{\mathbf{I}}$ , where  $\alpha^{\mathbf{I}}$  represents the “strength” of the perturbation on atom  $\mathbf{I}$  (usually chosen small enough to maintain a linear response regime) and  $n^{\mathbf{I}}$  is the occupation. The interacting ( $\chi$ ) and the non-interacting ( $\chi_0$ ) density response functions of the system with respect to localized perturbations are first calculated. Then the Hubbard  $U$  can be obtained by  $U_{\text{eff}} = 1/\chi - 1/\chi_0$ .

VASP (version  $\geq 5$ ) can perform the linear response calculation with LDAU = T and LDAUTYPE = 3. In this case, LDAUU and LDAUJ should be both set as  $\alpha^{\mathbf{I}}$ , and  $n^{\mathbf{I}}$  will be printed with LDAUPRINT = 2. The POSCAR of TbMn<sub>6</sub>Sn<sub>6</sub> primitive cell reads (for the POSCAR file, see **Supplementary II**)

TbMn6Sn6  
1.0000000000000000  
5.4465354000000001 0.0000000000000000 0.0000000000000000  
-2.7232677000000001 4.7168380000000001 0.0000000000000000  
0.0000000000000000 0.0000000000000000 8.9694351999999995  
Tb Sn Mn  
1 6 6

Direct  
-0.0000000000000000 0.0000000000000000 -0.0000000000000000  
0.3333333340000024 0.6666666679999977 0.5000000000000000  
0.66666666109999966 0.3333333089999968 0.5000000000000000  
0.3333333340000024 0.6666666679999977 -0.0000000000000000  
0.66666666109999966 0.3333333089999968 -0.0000000000000000  
-0.0000000000000000 0.0000000000000000 0.6662294578627622  
-0.0000000000000000 0.0000000000000000 0.3337705681372400  
0.5000000000000000 0.0000000000000000 0.7515951515947960  
0.5000000000000000 0.0000000000000000 0.2484048484052040  
0.0000000000000000 0.5000000009999965 0.7515951515947960  
-0.0000000000000000 0.5000000009999965 0.2484048484052040  
0.5000000000000000 0.5000000009999965 0.7515951515947960  
0.5000000000000000 0.5000000009999965 0.2484048484052040

To calculate the linear response of one Tb atom in TbMn<sub>6</sub>Sn<sub>6</sub>, the parameters in the INCAR, are

```
LDAU = T ; LDAUTYPE = 3
LDAUL = 3 -1 -1
LDAU = *** 0 0
LDAUJ = *** 0 0
LDAUPRINT = 2 ; LORBIT = 11
```

in which \*\*\* denotes the given  $\alpha^I$  for the Tb 4f orbital (in eV). The operation starts from a usual calculation with  $\alpha^I = 0$ . With the generated CHGCAR and WAVECAR, the interacting ( $\chi$ ) density response calculation runs with given  $\alpha^I$  and ISTART = 1, ICHARG = 1.  $n^I$  can be found in the OUTCAR. For the non-interacting ( $\chi_0$ ) calculation

with given  $\alpha^I$ , use ISTART = 1, ICHARG = 11 to keep the wavefunctions fixed. **Fig. S1** shows the results, in which  $n$  ( $n_0$ ) is the occupation of interacting (non-interacting) calculation, respectively. By fitting the slopes,  $\chi = 3.99 \text{ eV}^{-1}$  and  $\chi_0 = 0.30 \text{ eV}^{-1}$ , and then  $U_{\text{eff}} = 1/\chi - 1/\chi_0 = 3.1 \text{ eV}$ , are obtained.

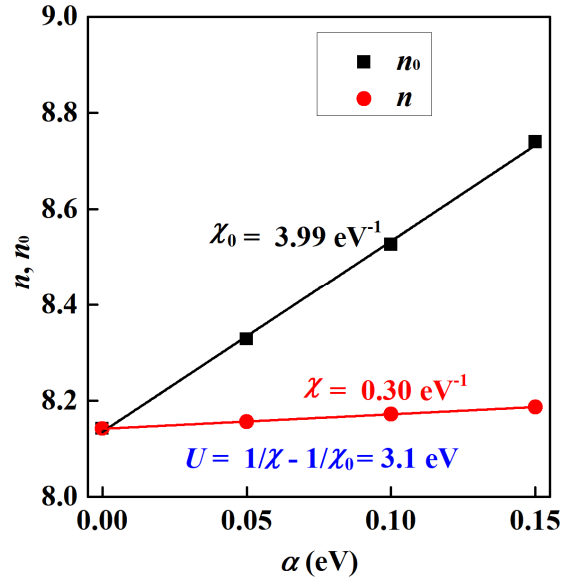

**Fig. S1** The interacting (black) and non-interacting density response functions of Tb 4f orbital in TbMn<sub>6</sub>Sn<sub>6</sub>.

#### References:

- [1] M. Cococcioni, S. de Gironcoli, *Phys. Rev. B* **71**, 035105 (2005).
- [2] M. T. Czyżyk, G. A. Sawatzky, *Phys. Rev. B* **49**, 14211 (1994).
- [3] S. L. Dudarev, G. A. Botton, S. Y. Savrasov, C. J. Humphreys, A. P. Sutton, *Phys. Rev. B* **57**, 1505 (1998).

## 2. Atomic-orbital-resolved energy bands

Fig. S2 shows the energy bands of  $\text{TbMn}_6\text{Sn}_6$  resolved by Tb and Mn atomic orbitals. The color shows the proportion of Tb / Mn atomic orbitals in the band states. We can see narrow Tb  $4f$  bands near the Fermi level. Other bands near the Fermi level are mainly Mn  $3d$  bands.

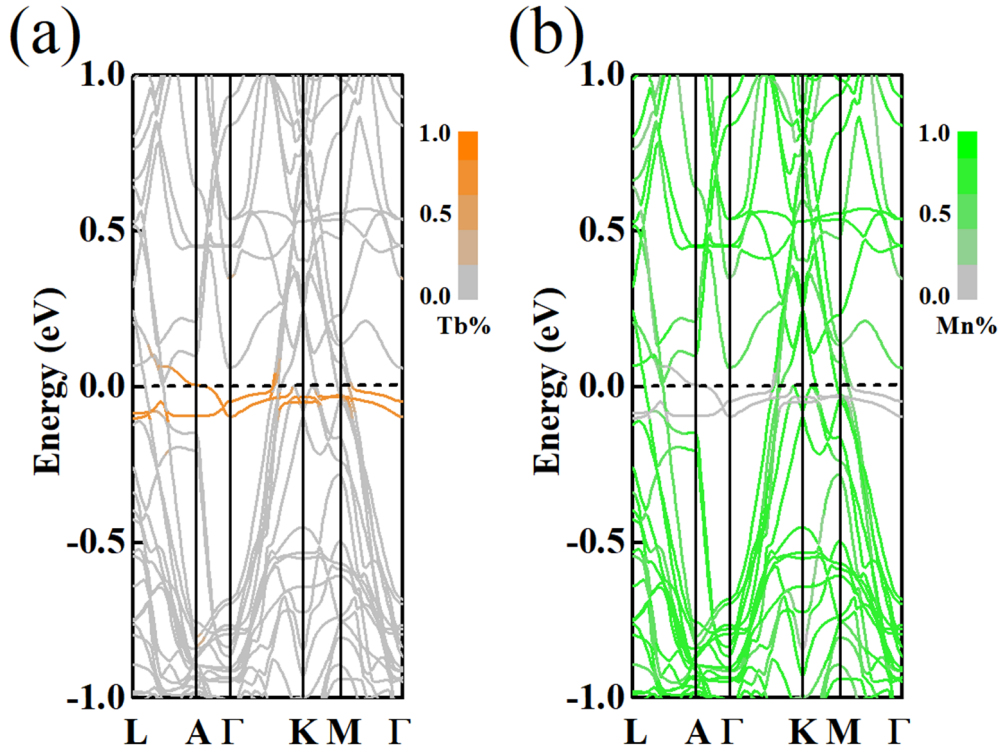

Fig. S2 The energy bands of  $\text{TbMn}_6\text{Sn}_6$  resolved by Tb and Mn atomic orbitals. The Fermi level is set zero.

### 3. The Dirac points

To show the Dirac points generated by kagome Mn arrangement, the energy bands near the K point are enlarged in **Fig. S3**. We can see one Dirac cone below the Fermi level, and two Dirac cones above the Fermi level. Small gaps are opened by spin-orbit coupling.

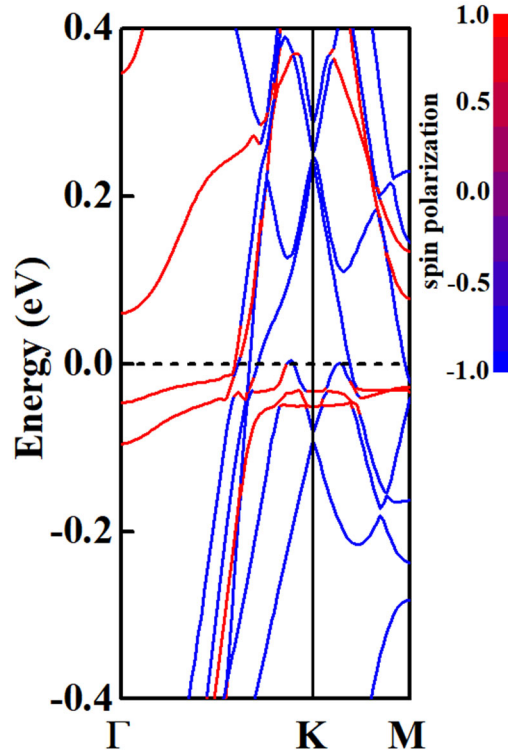

**Fig. S3** The energy bands of TbMn<sub>6</sub>Sn<sub>6</sub> near the K point. The spin-polarization of each state is resolved. The Fermi level is set zero.

#### 4. Chemical potential of atomic layers in TbMn<sub>6</sub>Sn<sub>6</sub>

TbMn<sub>6</sub>Sn<sub>6</sub> has a layered crystal structure, and its unit cell structure is ABCB stacking. In order to simplify the calculation, the chemical potential of each layer of TbMn<sub>6</sub>Sn<sub>6</sub> is evaluated (instead of evaluating the chemical potential of each element), and only the interactions between the nearest and second-nearest layers are considered. Let's use  $I_{AB}$  represents the influence of layer B on the chemical potential of layer A.  $I_{BA}$ ,  $I_{BC}$ ,  $I_{CB}$ ,  $I_{BB}$ ,  $I_{AC}$  and  $I_{CA}$  have similar meaning. The chemical potentials of layers A, B, and C are

$$\begin{aligned}\mu_A &= \mu_{A0} + 2I_{AB} + 2I_{AC} \\ \mu_B &= \mu_{B0} + I_{BA} + I_{BC} + 2I_{BB} \\ \mu_C &= \mu_{C0} + 2I_{CB} + 2I_{AC}\end{aligned}\tag{S1}$$

Here,  $\mu_{A0}$ ,  $\mu_{B0}$  and  $\mu_{C0}$  represent the chemical potentials of the A, B and C layers without interactions, respectively. Suppose the symmetric relationships  $I_{AB} = I_{BA}$ ,  $I_{BC} = I_{CB}$ ,  $I_{AC} = I_{CA}$ . Under these assumptions, the free energy of TbMn<sub>6</sub>Sn<sub>6</sub> unit cell reads

$$E_{cell} = \mu_{A0} + 2\mu_{B0} + \mu_{C0} + 4I_{AB} + 4I_{BC} + 4I_{AC} + 4I_{BB}\tag{S2}$$

The free energy of TbMn<sub>6</sub>Sn<sub>6</sub> unit cell without one A layer reads

$$E_{(without\ A)} = 2\mu_{B0} + \mu_{C0} + 4I_{BC} + 4I_{BB}\tag{S3}$$

The free energy of TbMn<sub>6</sub>Sn<sub>6</sub> unit cell without one B layer reads

$$E_{(without\ B)} = \mu_{A0} + \mu_{B0} + \mu_{C0} + 2I_{AB} + 2I_{BC} + 4I_{AC}\tag{S4}$$

The free energy of TbMn<sub>6</sub>Sn<sub>6</sub> unit cell without one C layer reads

$$E_{(without\ C)} = \mu_{A0} + 2\mu_{B0} + 4I_{AB} + 4I_{BB}\tag{S5}$$

The free energy of TbMn<sub>6</sub>Sn<sub>6</sub> unit cell without one A and one B layer reads

$$E_{(without\ AB)} = \mu_{B0} + \mu_{C0} + 2I_{BC}\tag{S6}$$

The free energy of TbMn<sub>6</sub>Sn<sub>6</sub> unit cell without one B and one C layer reads

$$E_{(without\ BC)} = \mu_{A0} + \mu_{B0} + 2I_{AB}\tag{S7}$$

The free energy of TbMn<sub>6</sub>Sn<sub>6</sub> unit cell without one A and one C layer reads

$$E_{(without\ AC)} = 2\mu_{B0} + 4I_{BB}\tag{S8}$$

The relationships S2~S8 can be summarized as

$$\begin{pmatrix} E_{cell} \\ E_{(without A)} \\ E_{(without B)} \\ E_{(without C)} \\ E_{(without AB)} \\ E_{(without BC)} \\ E_{(without AC)} \end{pmatrix} = \begin{pmatrix} 1 & 2 & 1 & 4 & 4 & 4 & 4 \\ 0 & 2 & 1 & 0 & 4 & 0 & 4 \\ 1 & 1 & 1 & 2 & 2 & 4 & 0 \\ 1 & 2 & 0 & 4 & 0 & 0 & 4 \\ 0 & 1 & 1 & 0 & 2 & 0 & 0 \\ 1 & 1 & 0 & 2 & 0 & 0 & 0 \\ 0 & 2 & 0 & 0 & 0 & 0 & 4 \end{pmatrix} \begin{pmatrix} \mu_{A0} \\ \mu_{B0} \\ \mu_{C0} \\ I_{AB} \\ I_{BC} \\ I_{AC} \\ I_{BB} \end{pmatrix} \quad (S9)$$

DFT calculations are employed to calculate the above seven energy values on the left ( $E_{cell} = -89.94$  eV,  $E_{(without A)} = -63.01$  eV,  $E_{(without B)} = -55.20$  eV,  $E_{(without C)} = -77.19$  eV,  $E_{(without AB)} = -34.39$  eV,  $E_{(without BC)} = -43.49$  eV,  $E_{(without AC)} = -52.82$  eV). Using the inverse of the matrix,  $\mu_{A0} = -12.15$  eV,  $\mu_{B0} = -25.23$  eV,  $\mu_{C0} = -8.13$  eV,  $I_{AB} = -3.06$  eV,  $I_{BC} = -0.52$  eV,  $I_{AC} = -0.64$  eV,  $I_{BB} = -0.59$  eV can be obtained. Finally, the chemical potentials  $\mu_A = -19.54$  eV,  $\mu_B = -29.98$  eV and  $\mu_C = -10.44$  eV of the A, B and C layers are calculated by Eq. (S1).

## 5 The structure of Sn bulk

Sn bulk has various phases including  $\alpha$ -Sn,  $\beta$ -Sn,  $\gamma$ -Sn, simple hexagonal (sh), hexagonal close packed (hcp), body-centered tetragonal (bct), body-centered cubic (bcc), and face-centered cubic (fcc). At normal pressures, the three stable solid phases are  $\alpha$ -Sn,  $\beta$ -Sn and  $\gamma$ -Sn (for the structures, see **Fig. S4(a), (b) and (c)**), for which phase transition occurs at different temperatures. At low temperatures, the stable phase is  $\alpha$ -Sn (diamond-like). At normal temperatures, the stable phase is  $\beta$ -Sn. At the temperatures close to the melting point (305 K), it changes to  $\gamma$ -Sn. We use  $\gamma$ -Sn to approximately represent the liquid phase. The POSCAR is listed below (for the POSCAR file, see **Supplementary II**).

```

Gamma-Sn
1.0000000000000000
5.7463446548044628    0.0000000000000000    0.0000000000000000
0.0000000000000000    6.1331794691422576    0.0000000000000000
0.0000000000000000    0.0000000000000000    3.2280194327051928
Sn
4
Direct
-0.0000000000000000    0.0000000000000000    -0.0000000000000000
0.0000000000000000    0.5000000000000000    0.0000000000000000
0.5000000000000000    0.0000000000000000    0.5000000000000000
0.5000000000000000    0.5000000000000000    0.5000000000000000

```

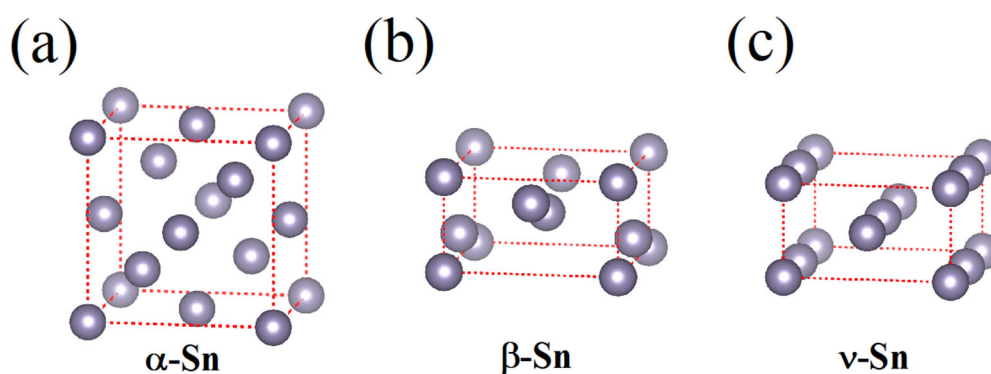

**Fig. S4** The structures of (a)  $\alpha$ -Sn, (b)  $\beta$ -Sn and (c)  $\gamma$ -Sn. The periodic boundary is shown by dashed liens.

### References:

[1] B. H. Cheong and K. J. Chang, *Phys. Rev. B* **44**, 4103 (1991).



## 6 HER on the (001) surfaces of TbMn<sub>6</sub>Sn<sub>6</sub>

**Fig. S5** shows the free energy profile of HER on the surfaces A, B1 and C of TbMn<sub>6</sub>Sn<sub>6</sub>. The computational hydrogen electrode model sets the free energies of H<sup>+</sup> + e and H<sub>2</sub> as zero. On the surfaces A, B1 and C, the onset potentials of HER are -0.79, -0.36 and -0.55 V, respectively.

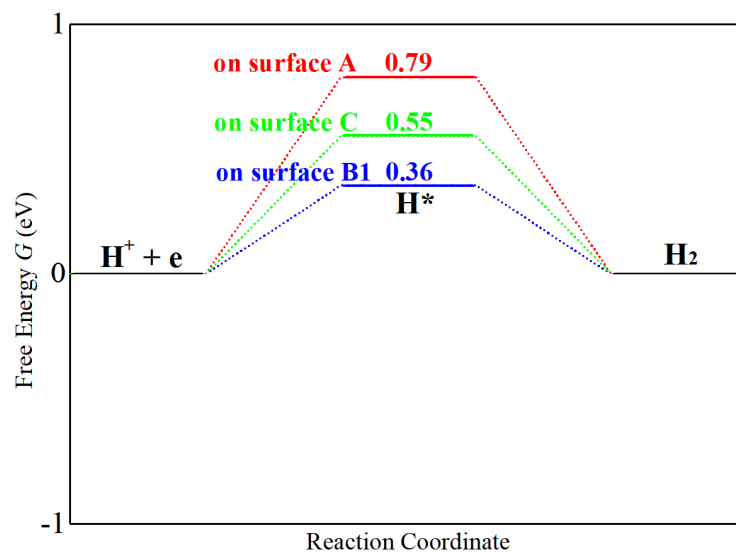

**Fig. S5** The reaction free energy of hydrogen evolution reaction on the surfaces A, B1 and C of TbMn<sub>6</sub>Sn<sub>6</sub>.
